# Supplementary material
Source: PubMed Central journal article supplement (PMC514941)
Supplement: 7600274s1.pdf [file 7600274s1.pdf]

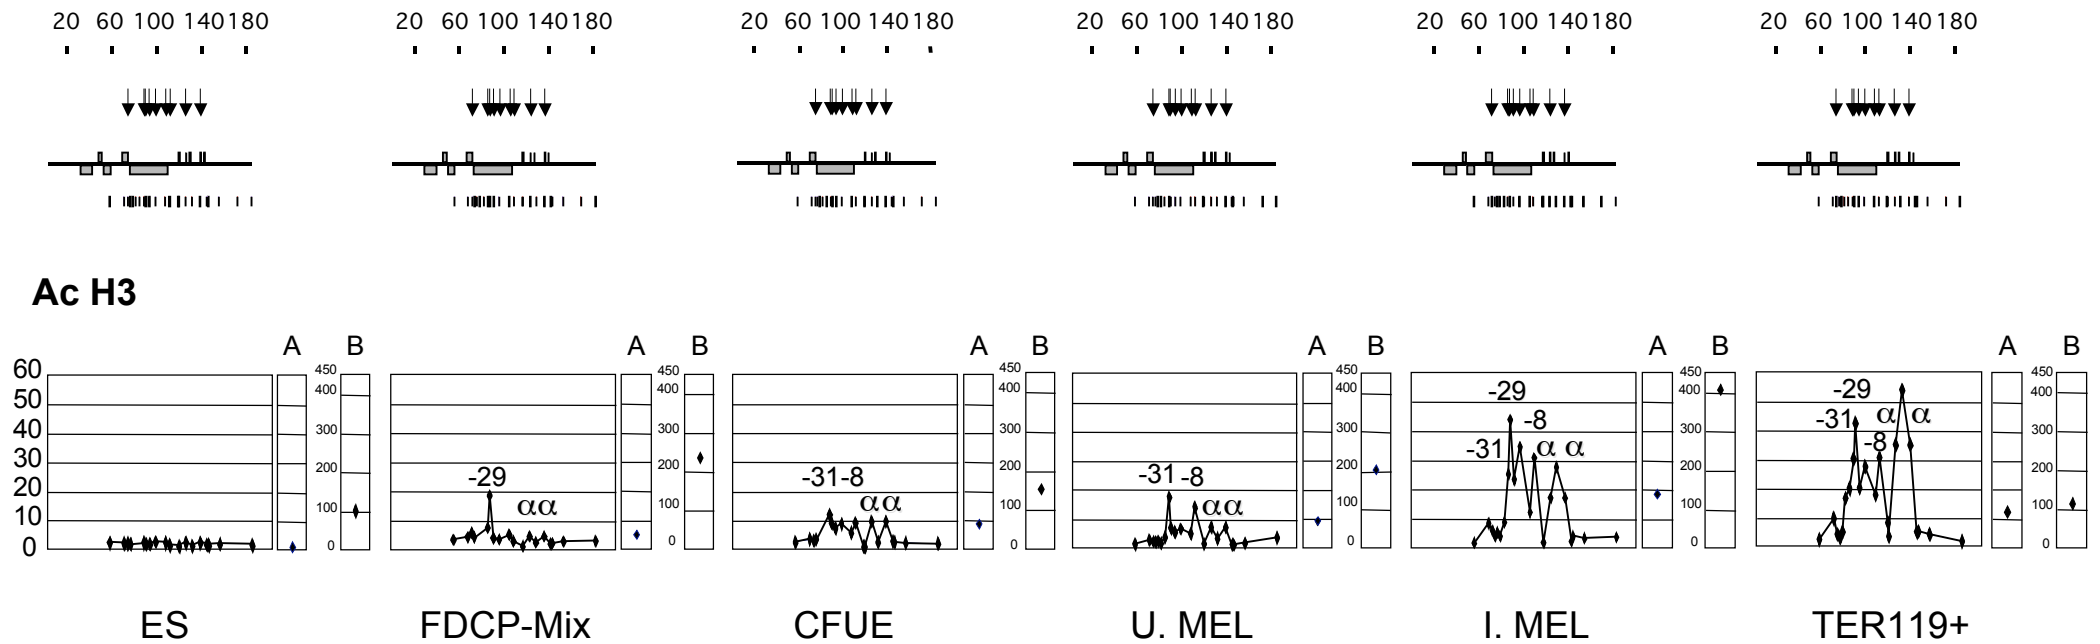

**Supplementary Figure 1. ChIP analysis of histone H3 acetylation mirrors H4 acetylation.** As for other histone modifications associated with gene activation the first modification is at HS-29 in FDCP-mix. As differentiation proceeds H3 acetylation extends affecting eventually the area in between the  $\alpha$ -globin genes. The diagrams and plots follow Fig 4. A, control sequence at HS 2 of the  $\beta$ -globin LCR. B is a control at the  $\beta$ -actin CpG island. Note the different scale for the  $\beta$ -actin control. U. MEL, uninduced mouse erythroleukemia cells, I. MEL, induced mouse erythroleukemia cells.
