# Supplementary material
Source: PubMed Central journal article supplement (PMC514941)
Supplement: 7600274s2.pdf [file 7600274s2.pdf]

## LMO2

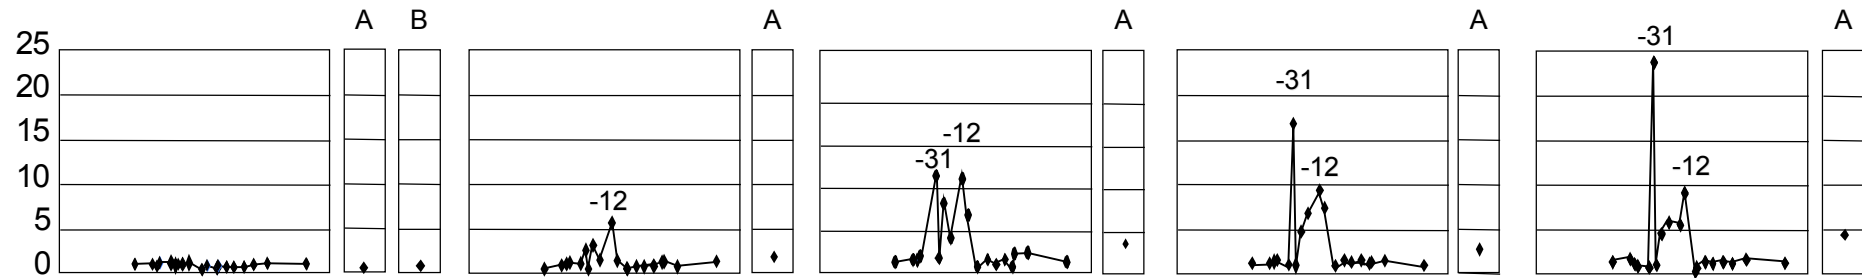

## E2A

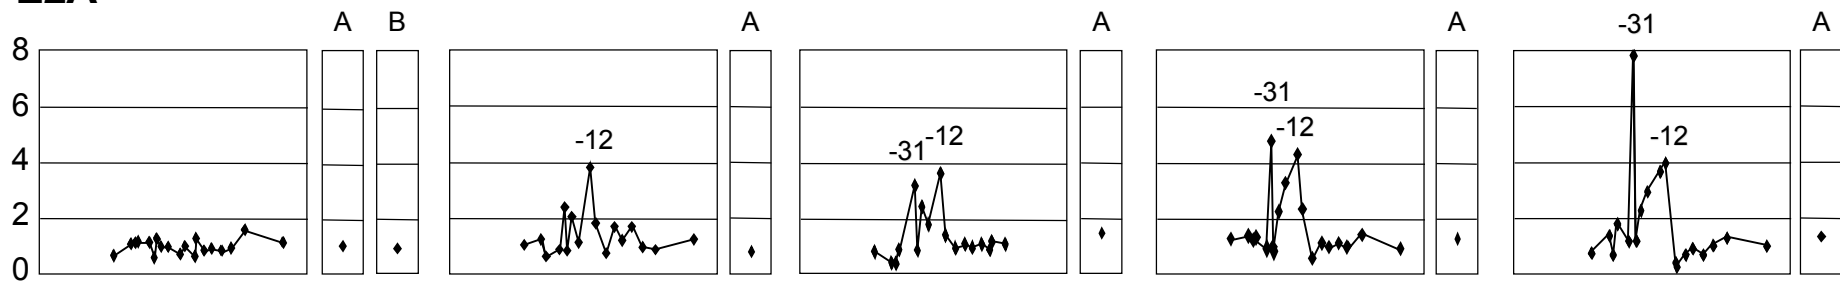

ES

FDCP-Mix

U. MEL

I. MEL

TER119+

**Supplementary Figure 2. ChIP analysis of the other components of the SCL complex, LMO2 and Ldb-1** Binding of these factors follow GATA/SCL binding. Plots are as for Fig 4. A, control sequence at HS 2 of the  $\beta$ -globin LCR. B is a control at the  $\beta$ -actin CpG island.
