# Supplementary material
Source: PubMed Central journal article supplement (PMC514941)
Supplement: 7600274s3.pdf [file 7600274s3.pdf]

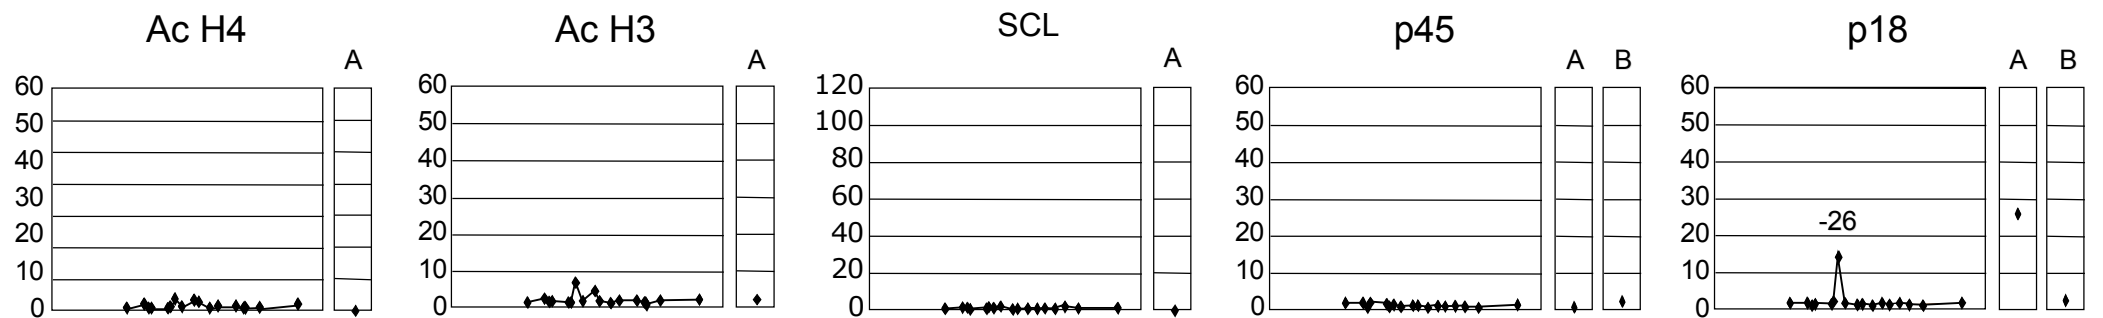

## L929

**Supplementary Figure 3. ChIP analysis mature in non-erythroid cells.** L929 fibroblasts show no significant enrichment in histone acetylation at the  $\alpha$ -globin domain, compared with surrounding areas. The study of hemopoietic specific transcription factors SCL and NF-E2 p45 demonstrated no enrichment. Nevertheless, the ubiquitous subunit of NF-E2, p18, which is highly expressed in these cells (data non shown), binds to HS-26, and a HS is detected in this cell type (see Figure 2).
