# Supplementary material
Source: PubMed Central journal article supplement (PMC514941)
Supplement: 7600274s5.pdf [file 7600274s5.pdf]

| <b>Coordinate</b> | <b>Sequence</b>                                   |
|-------------------|---------------------------------------------------|
| 55413             | 5' -AACATTGACCCTGTCATGAGCA-3'                     |
| 55437             | 5' -FAM-CAGGGAATGCCAAACACTCCAACAGCT-3' -TAMRA     |
| 55484             | 5' -GCATGTGATGTGGCCTCTTG-3'                       |
| 68324             | 5' -GGCCTCTTCACTGCATAGTTCA-3'                     |
| 68348             | 5' -FAM-ACCCAAGGCTCAGTACAGGCCCAAGAT-3' -TAMRA     |
| 68400             | 5' -CTGCAAGCATGACTGGCATAG-3'                      |
| 71754             | 5' -GGAGTCCAGTAGCCCAGCTGT-3'                      |
| 71803             | 5' -FAM-CAATACCTATACGGGCTGCTGCCACCA-3' -TAMRA     |
| 71823             | 5' -TGTCCACTCCCCTGCATGA-3'                        |
| 73894             | 5' -GCTGCAGGCACATTGAGGA-3'                        |
| 73914             | 5' -FAM-AGCAGCCCGCTCATGCTCTGAGA-3' -TAMRA         |
| 73959             | 5' -GACAGAGAACCTGCTGGCTAGC-3'                     |
| 76052             | 5' -AGGTCACCCAGCTTGTCTCTGA-3'                     |
| 76075             | 5' -FAM-ACCTGTGCTCTTTCCCTAGCTTCCCTCG-3' -TAMRA    |
| 76129             | 5' -CTTCCCTGTGTTAAGTGCTTTGAG-3'                   |
| 78595             | 5' -TCCTGGGTAGGCCTCTGCTA-3'                       |
| 78640             | 5' -FAM-CTATGCACCCTGAGGCCACCAG-3' -TAMRA          |
| 78665             | 5' -ATGCCAGTATCCTCACCTGGTAGT-3'                   |
| 82248             | 5' -ATCAATGTGGCAGAGACAATGG-3'                     |
| 82273             | 5' -FAM-CCTGCCCCGGACTCCTAGAGAACAC-3' -TAMRA       |
| 82324             | 5' -CAGAGAGAGGATGTGCTGTGGAT-3'                    |
| 85870             | 5' -TTCTGACCTCACCTCAGCTAAGC-3'                    |
| 85894             | 5' -FAM-TCTTCCTCCTCTGAGAATCCGCCATG-3' -TAMRA      |
| 85943             | 5' -TGTGTGGGCAGAGGACACA-3'                        |
| 87635             | 5' -CAGCTCTCCCAGAGCACAGAC-3'                      |
| 87657             | 5' -FAM-ATTACGGCAAACCTCCAACCTCCATCCACTG-3' -TAMRA |
| 87707             | 5' -CCCACTCGAGGAAATCCAAGT-3'                      |

91109 5' -GTACAGAGTCAGAAAGGAAAGGACAA-3'

91136 5' -FAM-TGGTACCACTGATTAGGACCTCTGACGCTG-3' -TAMRA

91188 5' -GGCAAATAAACAGGATGGGAAA-3'

96151 5' -GGGAGCTCACCCTTTCCAA-3'

96173 5' -FAM-CCATTGGTACATCTGTCTCCCTATTGGCA-3' -TAMRA

96223 5' -CCCAGACAGGGAGGACTAGGT-3'

105216 5' -AACCTGACTCAAAACAACAAGTAA-3'

105243 5' -FAM-ACCATCATCGCCCAGAGCAGAAGG-3' -TAMRA

105293 5' -GGTTTCTGAGTTTCCTTATCTGCAA-3'

109050 5' -TCTCCCTTAGGTAGAGTAGGAAACCA-3'

109077 5' -FAM-ATGGGTGCCAGGCCTTATCTGTCCC-3' -TAMRA

109121 5' -CCTTGGCCTGAGCAAGTGA-3'

116320 5' -CAGTGGGCAAGAGCGATAGC-3'

116341 5' -FAM-CTTGCCCTTACAGTCCCACCAAGCC-3' -TAMRA

116387 5' -AGCCAGCAACAATGGGAATT-3'

117166 5' -GCGTAGGTGCCATTAGAAGCTAGA-3'

117201 5' -FAM-CCCTTGCATCTTAGTTACGGACAGTA-3' -TAMRA

117247 5' -ACTGCCCTGGAGAGAATGCA-3'

123301 5' -TGACCAAGGTAGGAGGATACTAACTTCT-3'

123330 5' -FAM-CCCAAAGTCCATCACTGGAGACGTAGT-3' -TAMRA

123383 5' -TTGCCCGGACACACTTCTTAC-3'

128819 5' -GCTTCCACTCTGGTCATTCTCTAGAC-3'

128873 5' -FAM-CAGGCCTAACCCATCTGGATCTGAGCAG-3' -TAMRA

128896 5' -GGTGAAGTGCCTTGCAAATAGG-3'

136205 5' -TGACCAAGGTAGGAGGATACTAACTTCT-3'

136234 5' -FAM-CCCAAAGTCCATCACTGGAGACGTAGT-3' -TAMRA

136287 5' -TTGCCCGGACACACTTCTTAC-3'

142181 5' -GGTTTGGCACAGACACAGTTATTT-3'  
 142236 5' -FAM-TTCAGCCATCTGTGCATCAGAGGTATCCA-3' -TAMRA  
 142264 5' -TATTGTCCTTCAGTTCCTAATTCATGG-3'  
 142792 5' -GCCCACTTGGAACTACTTCATT-3'  
 142842 5' -FAM-AGGAACTCCAGACACCTTCTCCAGCCA-3' -TAMRA  
 142866 5' -GCAGGGCAAGATGTGACAGAA-3'  
 143487 5' -GCCTCCGAGGGTCATCAAC-3'  
 143532 5' -FAM-ATGCAAACCTCTGTCAGTCCCACCCA-3' -TAMRA  
 143563 5' -GAACTCAGGGCCTATCAGGAATCT-3'  
 153457 5' -GGCCAAGCAGACCTGTCAA-3'  
 153478 5' -FAM-ACCCTTCCCAACCAAGTGACCGTTCTC-3' -TAMRA  
 153526 5' -GGGTCACCCAGTTACAGGCA-3'  
 169583 5' -CTTGAAGCCATGGAAGAACAGAA-3'  
 169607 5' -FAM-ACCGTTCGTGTCCAAAGCCCAGC-3' -TAMRA  
 169660 5' -TCCCAGAGTAGAGTGAATACATGAACAC-3'  
 182179 5' -GAAGAGATGCCCTCCAGAAC-3'  
 182203 5' -FAM-CTCCTTCCTGTATGATCCTGCCGTGTG-3' -TAMRA  
 182254 5' -CTGGAGCTGATGGAGTGCTGT-3'

### Controls

$\beta$ -ActinCpG-F 5' -CGGTGTGGGCATTTGATGA-3'  
 $\beta$ -ActinCpG-Probe 5' -FAM-AAGATGGACCTAATACGGCTTTTAAACACCCG-3' -TAMRA  
 $\beta$ -ActinCpG-R 5' -CGTCTGGTTCCCAATACTGTGTAC-3'  
 HS2- $\beta$ -F 5' -CCCAGGCGGAGTCAATTCT-3'  
 HS2- $\beta$ -Probe 5' -FAM-CCACCCTGTGGGTGTGTTTCAGCCTT-3' -TAMRA  
 HS2- $\beta$ -R 5' -TGTGCTCAAGCCTGATGCTG-3'  
 GATA-2 (-2.8)-F 5' -GCGATAATCTGGAAGGCAGAGAT-3'  
 GATA-2 (-2.8)-Probe 5' -FAM-AGAAACACCATTTATTCGCGGCACTTT-3' -TAMRA

|                |                                        |
|----------------|----------------------------------------|
| GATA-2(-2.8)-R | 5'-GTTGTACAGGGCTGGGAATTG-3'            |
| GAPDH-F        | 5'-CAAGGCTGTGGGCAAGGT-3'               |
| GAPDH-Probe    | 5'-FAM-ACGGGAAGCTCACTGGCATGGC-3'-TAMRA |
| GAPDH-R        | 5'-TCACCACCTTCTTGATGTCATCA-3'          |

**Supplementary Table. Oligonucleotides used in real time PCR**

**analysis.** The left column shows the coordinate for the first base of primers and Fam-Tamra labelled probes from mouse chromosome 11 according to the published sequence of mouse alpha-globin cluster (accession number AY016021). The identification of the external controls is also shown. On the right column is the corresponding sequence of the different oligonucleotides.
